# Supplementary material for: Effect of hydrogenation on the microwave absorption properties of BaTiO3 nanoparticles
Source: Royal Society of Chemistry journal article supplement (doi:10.1039/c5ta02109j), 2015-01-01
Supplement: c5ta02109j1.pdf [file c5ta02109j1.pdf]

## Effect of Hydrogenation on the Microwave Absorption Properties of BaTiO<sub>3</sub> Nanoparticles

Lihong Tian,<sup>a,b</sup> Xiaodong Yan,<sup>a</sup> JiLian Xu,<sup>c</sup> Petra Wallenmeyer,<sup>a</sup> James Murowchick,<sup>d</sup> Lei Liu,<sup>c,\*</sup> Xiaobo Chen<sup>a,\*</sup>

<sup>a</sup> Department of Chemistry, University of Missouri – Kansas City, Kansas City, MO 64110, USA.

<sup>b</sup> Hubei Collaborative Innovation Center for Advanced Organochemical Materials, Hubei University, Wuhan, 430062, China.

<sup>c</sup> State Key Laboratory of Luminescence and Applications, Changchun Institute of Optics, Fine Mechanics and Physics, Chinese Academy of Sciences, Changchun, 130033, People's Republic of China.

<sup>d</sup> Department of Geosciences, University of Missouri – Kansas City, Kansas City, MO 64110, USA.

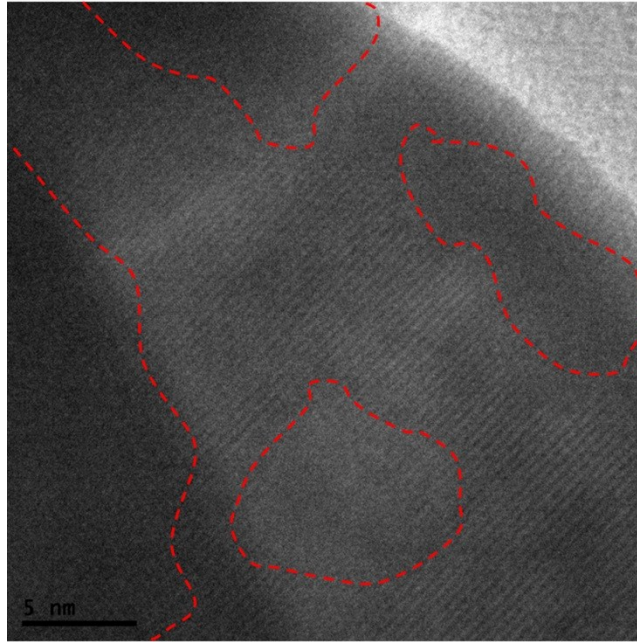

**Figure S1.** High-resolution transmission electron microscopy image of hydrogenated BaTiO<sub>3</sub> nanoparticles.
